# Supplementary material
Source: MDPI journal article supplement (https://www.mdpi.com/2073-4395/12/2/380)
Supplement: s1 [file s1]

## Supplementary Material

### File S1: Greenhouse gas emission calculation

$$GHG_{raw\ material} = \sum_{i=1}^n (R_i \times EF_{Ri}) \quad (S1)$$

where  $GHG_{raw\ material}$  is GHG emissions during raw material production phase (kg CO<sub>2</sub>eq ha<sup>-1</sup> year<sup>-1</sup>),  $R_i$  is the amount of agriculture input type  $i$  (kg ha<sup>-1</sup> crop<sup>-1</sup>),  $EF_{Ri}$  is the emission factor (EF) of agricultural input type  $i$ .

$$GHG_{transportation} = \sum_{i=1}^n (W(i) \times D(i) \times EF(ti)) \quad (S2)$$

where  $GHG_{transportation}$  is GHG emissions during transportation (kg CO<sub>2</sub>eq year<sup>-1</sup>),  $W(i)$  is the weight of type  $i$  (ton year<sup>-1</sup>),  $D(i)$  is the distance for transportation (km year<sup>-1</sup>),  $EF(ti)$  is the emissions factor of vehicle type  $t$  to transport material type  $i$  (kg CO<sub>2</sub>eq·t km<sup>-1</sup>).

$$GHG_{utilization} = \sum_{i=1}^n (M(i) \times EF(ui)) \quad (S3)$$

where  $GHG_{utilization}$  is GHG emissions during utilization phase of agriculture input (kg CO<sub>2</sub>eq ha<sup>-1</sup> year<sup>-1</sup>),  $M(i)$  is the amount of agricultural input type  $i$  used (kg ha<sup>-1</sup> crop<sup>-1</sup>),  $EF(ui)$  is the emissions factor for using agriculture input type  $i$ .

$$GHG_{CH_4} = EF_{adj} \times t \quad (S4)$$

where  $GHG_{CH_4}$  is the methane emissions during rice cultivation (kg CH<sub>4</sub> ha<sup>-1</sup>);  $EF_{adj}$  is the adjusted daily emissions factor (kg CH<sub>4</sub> ha<sup>-1</sup> day<sup>-1</sup>); and  $t$  is the duration of rice growth (days).

The  $EF_{adj}$  can be calculated using Equation (10) [41].

$$EF_{adj} = (EF_c \times SF_w \times SF_p \times SF_o) \quad (S5)$$

where  $EF_c$  is the baseline emissions factor for continuously flooded fields without organic amendments.  $SF_w$  and  $SF_p$  are scaling factors to account for the differences in water regime during and before the cultivation period, respectively.  $SF_o$  is the scaling factor to account for both type and amount of organic amendment applied.

$$SF_o = (1 + \sum_i ROA_i \times CFOA_i)^{0.59} \quad (S6)$$

where  $SF_o$  is the scaling factor for both type and amount of organic amendment applied,  $ROA_i$  is the application rate of organic amendment  $i$  (ton ha<sup>-1</sup>), and  $CFOA_i$  is the conversion factor for organic amendment  $i$ .

The direct N<sub>2</sub>O emissions from paddy fields were calculated as the following equation [105]:

$$GHG_{N_2O} = N \times \emptyset \times \frac{44}{28} \quad (S7)$$

where  $N$  is the quantity of nitrogen applications from compound fertilizers and organic fertilizers (kg N year<sup>-1</sup>),  $\emptyset$  is the emission factor of N<sub>2</sub>O emission due to N application (0.003 kg N<sub>2</sub>O-N kg<sup>-1</sup> of N for continuous flooding), and 44/28 is the molecular weight ratio of N<sub>2</sub>O to N<sub>2</sub>O-N.

### Life cycle inventory (LCI) data and sources for materials

**Table S1.** Emissions factors used for calculation of GHG emissions from raw materials production phase

| Activity                                     | Emissions factor | Unit                                   | Source                                                                          |
|----------------------------------------------|------------------|----------------------------------------|---------------------------------------------------------------------------------|
| Thailand’s country specific emission factors |                  |                                        |                                                                                 |
| Gasoline                                     | 0.3409           | kg CO <sub>2</sub> eq L <sup>-1</sup>  | The National Technical Committee on Product Carbon Footprinting (Thailand) [43] |
| Alachlor                                     | 8.0900           | kg CO <sub>2</sub> eq kg <sup>-1</sup> |                                                                                 |
| Paraquat                                     | 3.2300           | kg CO <sub>2</sub> eq kg <sup>-1</sup> |                                                                                 |
| Fertilizer 15-15-15                          | 2.0500           | kg CO <sub>2</sub> eq kg <sup>-1</sup> |                                                                                 |
| Fertilizer 0-0-60 (Potassium chloride)       | 0.5330           | kg CO <sub>2</sub> eq kg <sup>-1</sup> |                                                                                 |
| Fertilizer 16-20-0 (Ammonium phosphate)      | 3.7700           | kg CO <sub>2</sub> eq kg <sup>-1</sup> |                                                                                 |
| Rice seed                                    | 0.2500           | kg CO <sub>2</sub> eq kg <sup>-1</sup> | TGO [44]                                                                        |
| LCI dataset name                             |                  |                                        |                                                                                 |
| Diesel                                       | 0.38664          | kg CO <sub>2</sub> eq L <sup>-1</sup>  | Ecoinvent Centre [47] (IPCC 2013 GWP 100a)                                      |
| Nitrogen (N)                                 | 2.1178           | kg CO <sub>2</sub> eq kg <sup>-1</sup> |                                                                                 |
| Phosphorus (P <sub>2</sub> O <sub>5</sub> )  | 0.34464          | kg CO <sub>2</sub> eq kg <sup>-1</sup> |                                                                                 |
| Potassium (K <sub>2</sub> O)                 | 0.26885          | kg CO <sub>2</sub> eq kg <sup>-1</sup> |                                                                                 |
| Urea                                         | 3.3036           | kg CO <sub>2</sub> eq kg <sup>-1</sup> |                                                                                 |
| Acephate (Organophosphorus compound)         | 7.8097           | kg CO <sub>2</sub> eq kg <sup>-1</sup> |                                                                                 |
| Chlorpyrifos (Organophosphorus compound)     | 7.8097           | kg CO <sub>2</sub> eq kg <sup>-1</sup> |                                                                                 |
| Insecticide (unspecific)                     | 10.2089          | kg CO <sub>2</sub> eq kg <sup>-1</sup> | The National Technical Committee on Product Carbon Footprinting (Thailand) [46] |
| Herbicide (unspecific)                       | 16.5873          | kg CO <sub>2</sub> eq kg <sup>-1</sup> |                                                                                 |

**Table S2.** Emissions factors used for calculation of GHG emissions from utilization phase

| Activity                                                 | Emissions factor                                                                                        | Unit                                                  | Source                                                                              |
|----------------------------------------------------------|---------------------------------------------------------------------------------------------------------|-------------------------------------------------------|-------------------------------------------------------------------------------------|
| Glyphosate                                               | 16.0000                                                                                                 | kg CO <sub>2</sub> eq kg <sup>-1</sup>                | The National Technical Committee on Product Carbon Footprinting (Thailand) [46]     |
| Paraquat                                                 | 3.2300                                                                                                  | kg CO <sub>2</sub> eq kg <sup>-1</sup>                |                                                                                     |
| Alachlor                                                 | 8.0900                                                                                                  | kg CO <sub>2</sub> eq kg <sup>-1</sup>                |                                                                                     |
| Acephate<br>(Organophosphorus compound)                  | 7.8097                                                                                                  | kg CO <sub>2</sub> eq kg <sup>-1</sup>                | Ecoinvent Centre [47]<br>(IPCC 2013 GWP 100a)                                       |
| Chlorpyrifos<br>(Organophosphorus compound)              | 7.8097                                                                                                  | kg CO <sub>2</sub> eq kg <sup>-1</sup>                |                                                                                     |
| Transportation agriculture inputs to farm                |                                                                                                         |                                                       |                                                                                     |
| 4 wheels truck: 7 tonnes<br>(Diesel used)                | 0% Loading = 0.3111<br>50% Loading = 0.2681<br>75% Loading = 0.1829<br>100% Loading = 0.1402            | kg CO <sub>2</sub> eq tonnes km <sup>-1</sup>         | The National Technical Committee on Product Carbon Footprinting (Thailand) [43]     |
| Agriculture input                                        |                                                                                                         |                                                       |                                                                                     |
| Diesel used (stationary combustion) for farm operation   | 2.7446                                                                                                  | kg CO <sub>2</sub> eq L <sup>-1</sup>                 | IPCC [41]                                                                           |
| Gasoline used (stationary combustion) for farm operation | 2.1896                                                                                                  | kg CO <sub>2</sub> eq L <sup>-1</sup>                 |                                                                                     |
| Diesel used (mobile combustion) for farm operation       | Tractor = 3.908<br>Harvester = 2.645                                                                    | kg CO <sub>2</sub> eq L <sup>-1</sup>                 | Maciel et al. [48]<br>(calculated with diesel density of 0.832 kg L <sup>-1</sup> ) |
| Gasoline used (mobile combustion) for farm operation     | 2.319                                                                                                   | kg CO <sub>2</sub> eq L <sup>-1</sup>                 | EPA [45]                                                                            |
| CH <sub>4</sub> emission from rice cultivation           |                                                                                                         |                                                       |                                                                                     |
| EF <sub>c</sub>                                          | Southeast Asia = 1.22                                                                                   | kg CH <sub>4</sub> ha <sup>-1</sup> day <sup>-1</sup> | IPCC [41]                                                                           |
| SF <sub>w</sub>                                          | Irrigated areas<br>(continuously flooded, single drainage period, and multiple drainage periods) = 0.60 |                                                       |                                                                                     |
| SF <sub>p</sub>                                          | Non flooded pre -season<br>>180 days = 0.89                                                             |                                                       |                                                                                     |
| CFOA <sub>i</sub>                                        | Straw incorporated shortly (< 30 days)<br>before cultivation = 1.00                                     |                                                       |                                                                                     |
|                                                          | Straw incorporated long                                                                                 |                                                       |                                                                                     |

|  |                                       |  |  |
|--|---------------------------------------|--|--|
|  | (> 30 days) before cultivation = 0.19 |  |  |
|  | Compost = 0.17                        |  |  |
|  | Farm yard manure = 0.21               |  |  |
|  | Green manure = 0.45                   |  |  |

$EF_c$  = the baseline emissions factor for continuously flooded fields without organic amendments;  $SF_w$  = a scaling factor to account for the differences in water regime during the cultivation period;  $SF_p$  = a scaling factor to account for the differences in water regime in the pre-season before the cultivation period;  $SF_0$  = a scaling factor that accounts for differences in both type and amount of organic amendment applied source,  $SF_{s,r}$  = a scaling factor for soil type, rice cultivar, etc;  $CFOA$  = the conversion factor for organic amendment  $i$ .
